# Supplementary material for: Comprehensive Analysis of Evolutionary Characterization and Expression for Monosaccharide Transporter Family Genes in Nelumbo nucifera
Source: Frontiers journal article supplement (doi:10.3389/fevo.2021.537398), 2021-02-15
Supplement: Data_Sheet_1.xls [file Data_Sheet_1.xls]

## Sheet: TableS1
Supplementary Table 1: The result regarding NuMSTs in Nelumbo ucifera using the Hmm search tool and the information regarding these genes.
gene	protien	Chromosome no.	Genome location Star	Genome location End	ID Pfam	Domain
Nu_20869-RA	NuINT1	megascaffold_31	1077496	1084245	PF07690	MFS
Nu_05143-RA	NuINT2	megascaffold_6	25921981	25924268	PF07690	MFS
Nu_15996-RA	NuINT3	megascaffold_1	209978057	209981038	PF07690	MFS
Nu_15362-RA	NuINT4	megascaffold_43	221770	228486	PF07690	MFS
Nu_20358-RA	NupGlcT1	megascaffold_1	100509744	100511568	PF07690	MFS
Nu_26138-RA	NupGlcT2	megascaffold_2	96284205	96295431	PF07690	MFS
Nu_21420-RA	NupGlcT3	megascaffold_3	24813148	24835980	PF07690	MFS
Nu_07730-RA	NupGlcT4	megascaffold_4	21204106	21217849	PF07690	MFS
Nu_00446-RA	NupGlcT5	megascaffold_5	34131004	34140084	PF07690	MFS
Nu_05413-RA	NuPLT1	megascaffold_77	113443	117506	PF07690	MFS
Nu_05414-RA	NuPLT2	megascaffold_6	25935542	25937488	PF07690	MFS
Nu_01185-RA	NuPLT3	megascaffold_1	184241205	184244407	PF07690	MFS
Nu_16191-RA	NuPLT4	megascaffold_1	81392436	81394943	PF07690	MFS
Nu_15309-RA	NuSFP1	megascaffold_9	11528590	11534041	PF07690	MFS
Nu_06862-RA	NuSFP2	megascaffold_13	8598537	8604318	PF07690	MFS
Nu_01003-RA	NuSFP3	megascaffold_9	12921151	12927227	PF07690	MFS
Nu_05358-RA	NuSFP4	megascaffold_6	26936156	26937978	PF07690	MFS
Nu_05360-RA	NuSFP5	megascaffold_6	26910866	26915718	PF07690	MFS
Nu_09360-RA	NuSTP1	megascaffold_1	46859620	46862891	PF07690	MFS
Nu_09960-RA	NuSTP2	megascaffold_1	189346787	189350076	PF07690	MFS
Nu_17644-RA	NuSTP3	megascaffold_1	240858670	240864844	PF07690	MFS
Nu_06218-RA	NuSTP4	megascaffold_4	10684747	10686614	PF07690	MFS
Nu_06739-RA	NuSTP5	megascaffold_13	5242814	5248055	PF07690	MFS
Nu_06212-RA	NuSTP6	megascaffold_1	240913721	240920435	PF07690	MFS
Nu_12183-RA	NuSTP7	megascaffold_3	36955298	36958499	PF07690	MFS
Nu_21187-RA	NuSTP8	megascaffold_10	18375252	18377524	PF07690	MFS
Nu_26101-RA	NuSTP9	megascaffold_2	96955990	96958859	PF07690	MFS
Nu_06328-RA	NuSTP10	megascaffold_8	29016778	29018871	PF07690	MFS
Nu_22489-RA	NuSTP11	megascaffold_1	142435489	142443961	PF07690	MFS
Nu_22490-RA	NuSTP12	megascaffold_1	142457349	142466692	PF07690	MFS
Nu_25156-RA	NuSTP13	megascaffold_2	86084709	86088382	PF07690	MFS
Nu_24034-RA	NutMT1	megascaffold_6	50432308	50441256	PF07690	MFS
Nu_09472-RA	NutMT2	megascaffold_14	9876781	9885432	PF07690	MFS
Nu_01559-RA	NuVGT1	megascaffold_1	248970031	248974712	PF07690	MFS
Nu_18727-RA	NuVGT2	megascaffold_3	16787464	16793059	PF07690	MFS

## Sheet: TableS2
Supplementary Table 2: Identification of NuMST syntenic gene pairs with four other palnts
A.thaliana	Nelumbo ucifera		S.tuberosumand	Nelumbo ucifera		Grape	Nelumbo ucifera		maize	Nelumbo ucifera
AT1G34580.1	Nu_22489-RA		PGSC0003DMP400027173	Nu_22489-RA		GSVIVT01006723001	Nu_01185-RA		Zm00008a004621_P01	Nu_06218-RA
AT1G11260.1	Nu_06218-RA		PGSC0003DMP400017657	Nu_12183-RA		GSVIVT01006723001	Nu_06218-RA		Zm00008a000781_P01	Nu_06739-RA
AT1G79820.4	Nu_06862-RA		PGSC0003DMP400017657	Nu_06328-RA		GSVIVT01006723001	Nu_06862-RA		Zm00008a000781_P01	Nu_26101-RA
AT1G54730.3	Nu_06739-RA		PGSC0003DMP400032868	Nu_26101-RA		GSVIVT01021530001	Nu_26138-RA		Zm00008a003944_P01	Nu_25156-RA
AT1G11260.1	Nu_06739-RA		PGSC0003DMP400032868	Nu_17644-RA		GSVIVT01006723001	Nu_12183-RA		Zm00008a002557_P01	Nu_12183-RA
AT1G77210.1	Nu_06862-RA		PGSC0003DMP400032868	Nu_05360-RA		GSVIVT01021530001	Nu_24034-RA		Zm00008a004621_P01	Nu_12183-RA
AT1G20840.1	Nu_09472-RA		PGSC0003DMP400032901	Nu_05360-RA		GSVIVT01021530001	Nu_06328-RA		Zm00008a000781_P01	Nu_21420-RA
AT1G34580.1	Nu_25156-RA		PGSC0003DMP400032868	Nu_06328-RA		GSVIVT01015361001	Nu_01185-RA		Zm00008a000781_P01	Nu_17644-RA
AT1G11260.1	Nu_26101-RA		PGSC0003DMP400008152	Nu_21420-RA		GSVIVT01015387001	Nu_06739-RA		Zm00008a003944_P01	Nu_17644-RA
AT1G07340.1	Nu_25156-RA		PGSC0003DMP400045834	Nu_07730-RA		GSVIVT01015332001	Nu_26101-RA		Zm00008a004621_P01	Nu_07730-RA
AT1G79820.4	Nu_26138-RA		PGSC0003DMP400008152	Nu_05360-RA		GSVIVT01015361001	Nu_26138-RA		Zm00008a000705_P01	Nu_05413-RA
AT1G79820.4	Nu_21420-RA		PGSC0003DMP400025822	Nu_07730-RA		GSVIVT01001036001	Nu_25156-RA		Zm00008a000269_P01	Nu_05414-RA
AT1G67300.1	Nu_21420-RA		PGSC0003DMP400025822	Nu_00446-RA		GSVIVT01015361001	Nu_25156-RA		Zm00008a000781_P01	Nu_05413-RA
AT1G19450.1	Nu_12183-RA		PGSC0003DMP400024148	Nu_24034-RA		GSVIVT01015361001	Nu_21420-RA		Zm00008a001953_P01	Nu_05413-RA
AT1G79820.4	Nu_12183-RA		PGSC0003DMP400037752	Nu_00446-RA		GSVIVT01015387001	Nu_21420-RA		Zm00008a001863_P01	Nu_05413-RA
AT1G08890.1	Nu_21420-RA		PGSC0003DMP400018175	Nu_05414-RA		GSVIVT01015332001	Nu_17644-RA		Zm00008a004621_P01	Nu_05413-RA
AT1G34580.1	Nu_17644-RA		PGSC0003DMP400031785	Nu_25156-RA		GSVIVT01001036001	Nu_00446-RA		Zm00008a001953_P01	Nu_24034-RA
AT1G77210.1	Nu_07730-RA		PGSC0003DMP400031785	Nu_12183-RA		GSVIVT01015387001	Nu_05413-RA		Zm00008a000781_P01	Nu_06328-RA
AT1G11260.1	Nu_07730-RA		PGSC0003DMP400021179	Nu_18727-RA		GSVIVT01015387001	Nu_24034-RA		Zm00008a005930_P01	Nu_01185-RA
AT1G07340.1	Nu_17644-RA		PGSC0003DMP400031785	Nu_17644-RA		GSVIVT01015332001	Nu_24034-RA		Zm00008a006714_P01	Nu_01185-RA
AT1G54730.3	Nu_07730-RA		PGSC0003DMP400031785	Nu_06328-RA		GSVIVT01015332001	Nu_24034-RA		Zm00008a009884_P01	Nu_22489-RA
AT1G16390.1	Nu_07730-RA		Nu_09362-RA	Nu_09960-RA		GSVIVT01015361001	Nu_15309-RA		Zm00008a009597_P01	Nu_01185-RA
AT1G07340.1	Nu_07730-RA		Nu_16191-RA	Nu_01185-RA		GSVIVT01015387001	Nu_01003-RA		Zm00008a005930_P01	Nu_16191-RA
AT1G34580.1	Nu_00446-RA		Nu_06218-RA	Nu_06739-RA		GSVIVT01030384001	Nu_01185-RA		Zm00008a007211_P01	Nu_22489-RA
AT1G20840.1	Nu_24034-RA		Nu_17184-RA	Nu_06739-RA		GSVIVT01030495001	Nu_01185-RA		Zm00008a006714_P01	Nu_16191-RA
AT1G19450.1	Nu_05360-RA		Nu_09960-RA	Nu_12183-RA		GSVIVT01030384001	Nu_16191-RA		Zm00008a008770_P01	Nu_22489-RA
AT1G75220.1	Nu_05360-RA		Nu_16569-RA	Nu_12183-RA		GSVIVT01023340001	Nu_01185-RA		Zm00008a005930_P01	Nu_15996-RA
AT1G75220.1	Nu_05413-RA		Nu_17184-RA	Nu_07730-RA		GSVIVT01030495001	Nu_16191-RA		Zm00008a009884_P01	Nu_06862-RA
AT1G79820.4	Nu_24034-RA		Nu_09960-RA	Nu_17644-RA		GSVIVT01023340001	Nu_24034-RA		Zm00008a009884_P01	Nu_12183-RA
AT1G11260.1	Nu_06328-RA		Nu_17184-RA	Nu_00446-RA		GSVIVT01030495001	Nu_06328-RA		Zm00008a009884_P01	Nu_21420-RA
AT1G20840.1	Nu_06328-RA		Nu_09360-RA	Nu_04671-RA		GSVIVT01031077001	Nu_06862-RA		Zm00008a009597_P01	Nu_18727-RA
AT1G08890.1	Nu_01003-RA		Nu_16569-RA	Nu_05413-RA		GSVIVT01031077001	Nu_12183-RA		Zm00008a007058_P01	Nu_17644-RA
AT2G20780.1	Nu_01185-RA		Nu_17184-RA	Nu_05360-RA		GSVIVT01031006001	Nu_07730-RA		Zm00008a008933_P01	Nu_05413-RA
AT2G20780.1	Nu_09360-RA		Nu_16482-RA	Nu_05413-RA		GSVIVT01031006001	Nu_00446-RA		Zm00008a008770_P01	Nu_05413-RA
AT2G20780.1	Nu_16191-RA		Nu_22489-RA	Nu_05413-RA		GSVIVT01031077001	Nu_06328-RA		Zm00008a009644_P01	Nu_05413-RA
AT2G20780.1	Nu_09960-RA		Nu_01559-RA	Nu_24034-RA		GSVIVT01022035001	Nu_15309-RA		Zm00008a006714_P01	Nu_05413-RA
AT2G48020.1	Nu_06862-RA		Nu_01185-RA	Nu_24034-RA		GSVIVT01024413001	Nu_01559-RA		Zm00008a009362_P01	Nu_24034-RA
AT2G43330.1	Nu_00446-RA		Nu_16569-RA	Nu_06328-RA		GSVIVT01014025001	Nu_25156-RA		Zm00008a013524_P01	Nu_01559-RA
AT2G16120.1	Nu_05413-RA		Nu_21187-RA	Nu_04671-RA		GSVIVT01014025001	Nu_12183-RA		Zm00008a013524_P01	Nu_09360-RA
AT2G18480.1	Nu_05413-RA		Nu_06862-RA	Nu_17644-RA		GSVIVT01014025001	Nu_17644-RA		Zm00008a013524_P01	Nu_06218-RA
AT2G48020.1	Nu_15309-RA		Nu_06739-RA	Nu_00446-RA		GSVIVT01024413001	Nu_17644-RA		Zm00008a011396_P01	Nu_25156-RA
AT3G05960.1	Nu_06218-RA		Nu_06862-RA	Nu_01003-RA		GSVIVT01014025001	Nu_00446-RA		Zm00008a013524_P01	Nu_18727-RA
AT3G13050.1	Nu_15996-RA		Nu_09472-RA	Nu_24034-RA		GSVIVT01014025001	Nu_06328-RA		Zm00008a011192_P01	Nu_07730-RA
AT3G18830.1	Nu_01185-RA		Nu_25156-RA	Nu_26101-RA		GSVIVT01012912001	Nu_01185-RA		Zm00008a011396_P01	Nu_17644-RA
AT3G05400.1	Nu_06218-RA		Nu_25156-RA	Nu_12183-RA		GSVIVT01012912001	Nu_24034-RA		Zm00008a014444_P01	Nu_07730-RA
AT3G03090.1	Nu_01559-RA		Nu_26138-RA	Nu_21420-RA		GSVIVT01013414001	Nu_01559-RA		Zm00008a011192_P01	Nu_00446-RA
AT3G05150.1	Nu_01559-RA		Nu_26101-RA	Nu_17644-RA		GSVIVT01009024001	Nu_22489-RA		Zm00008a011396_P01	Nu_24034-RA
AT3G05960.1	Nu_06739-RA		Nu_25156-RA	Nu_06328-RA		GSVIVT01013414001	Nu_09472-RA		Zm00008a013524_P01	Nu_05358-RA
AT3G05150.1	Nu_06739-RA		Nu_12183-RA	Nu_17644-RA		GSVIVT01013414001	Nu_25156-RA		Zm00008a013524_P01	Nu_06328-RA
AT3G05150.1	Nu_06862-RA		Nu_12183-RA	Nu_07730-RA		GSVIVT01013414001	Nu_18727-RA		Zm00008a018748_P01	Nu_06739-RA
AT3G05400.1	Nu_06739-RA		Nu_12183-RA	Nu_00446-RA		GSVIVT01013414001	Nu_00446-RA		Zm00008a015024_P01	Nu_06739-RA
AT3G18830.1	Nu_06739-RA		Nu_18727-RA	Nu_05360-RA		GSVIVT01009719001	Nu_05360-RA		Zm00008a018748_P01	Nu_06862-RA
AT3G19930.1	Nu_25156-RA		Nu_18727-RA	Nu_15308-RA		GSVIVT01013414001	Nu_24034-RA		Zm00008a015024_P01	Nu_18727-RA
AT3G18830.1	Nu_12183-RA		Nu_07730-RA	Nu_00446-RA		GSVIVT01009024001	Nu_05413-RA		Zm00008a015024_P01	Nu_05413-RA
AT3G18830.1	Nu_21420-RA		Nu_00446-RA	Nu_06328-RA		GSVIVT01009024001	Nu_24034-RA		Zm00008a014988_P01	Nu_15309-RA
AT3G20460.1	Nu_21420-RA		Nu_24034-RA	Nu_15308-RA		GSVIVT01013414001	Nu_06328-RA		Zm00008a022108_P01	Nu_22489-RA
AT3G20460.1	Nu_17644-RA					GSVIVT01013414001	Nu_15309-RA		Zm00008a021364_P01	Nu_20358-RA
AT3G20460.1	Nu_07730-RA					GSVIVT01019859001	Nu_17644-RA		Zm00008a019095_P01	Nu_06862-RA
AT3G20460.1	Nu_24034-RA					GSVIVT01023868001	Nu_09472-RA		Zm00008a021646_P01	Nu_25156-RA
AT4G04750.1	Nu_01185-RA					GSVIVT01023868001	Nu_24034-RA		Zm00008a021646_P01	Nu_12183-RA
AT4G21480.1	Nu_09960-RA					GSVIVT01031930001	Nu_05413-RA		Zm00008a022108_P01	Nu_07730-RA
AT4G16480.1	Nu_15996-RA					GSVIVT01023868001	Nu_05413-RA		Zm00008a019095_P01	Nu_07730-RA
AT4G35300.1	Nu_09472-RA					GSVIVT01018988001	Nu_22489-RA		Zm00008a022108_P01	Nu_17644-RA
AT4G35300.1	Nu_25156-RA					GSVIVT01018949001	Nu_06739-RA		Zm00008a021364_P01	Nu_17644-RA
AT4G35300.1	Nu_24034-RA					GSVIVT01018949001	Nu_12183-RA		Zm00008a019095_P01	Nu_00446-RA
AT4G36670.1	Nu_05360-RA					GSVIVT01018988001	Nu_18727-RA		Zm00008a021364_P01	Nu_00446-RA
AT4G36670.1	Nu_05413-RA					GSVIVT01018988001	Nu_05413-RA		Zm00008a020652_P01	Nu_24034-RA
AT4G04750.1	Nu_24034-RA					GSVIVT01018949001	Nu_05360-RA		Zm00008a021364_P01	Nu_24034-RA
AT5G61520.1	Nu_21187-RA					GSVIVT01018949001	Nu_06328-RA		Zm00008a021646_P01	Nu_05360-RA
AT5G61520.1	Nu_06739-RA					GSVIVT01017844001	Nu_06218-RA		Zm00008a022108_P01	Nu_05413-RA
AT5G18840.1	Nu_06862-RA					GSVIVT01017836001	Nu_06739-RA		Zm00008a020312_P01	Nu_24034-RA
AT5G26250.1	Nu_25156-RA					GSVIVT01017844001	Nu_06862-RA		Zm00008a022108_P01	Nu_06328-RA
AT5G18840.1	Nu_12183-RA					GSVIVT01017836001	Nu_06862-RA		Zm00008a024631_P01	Nu_15309-RA
AT5G59250.1	Nu_18727-RA					GSVIVT01017935001	Nu_06739-RA		Zm00008a029199_P01	Nu_09960-RA
AT5G61520.1	Nu_12183-RA					GSVIVT01017844001	Nu_06739-RA		Zm00008a029086_P01	Nu_22489-RA
AT5G23270.1	Nu_17644-RA					GSVIVT01017935001	Nu_21420-RA		Zm00008a029199_P01	Nu_06218-RA
AT5G27350.1	Nu_17644-RA					GSVIVT01017935001	Nu_12183-RA		Zm00008a029203_P01	Nu_06212-RA
AT5G16150.1	Nu_07730-RA					GSVIVT01017836001	Nu_21420-RA		Zm00008a029086_P01	Nu_09960-RA
AT5G61520.1	Nu_07730-RA					GSVIVT01017836001	Nu_12183-RA		Zm00008a027364_P01	Nu_01185-RA
AT5G16150.1	Nu_00446-RA					GSVIVT01017935001	Nu_07730-RA		Zm00008a028036_P01	Nu_01185-RA
AT5G61520.1	Nu_00446-RA					GSVIVT01017836001	Nu_00446-RA		Zm00008a028036_P01	Nu_21187-RA
AT5G18840.1	Nu_00446-RA					GSVIVT01017935001	Nu_00446-RA		Zm00008a029199_P01	Nu_06739-RA
AT5G61520.1	Nu_05360-RA					GSVIVT01017844001	Nu_24034-RA		Zm00008a027728_P01	Nu_26101-RA
AT5G16150.1	Nu_05413-RA					GSVIVT01017836001	Nu_24034-RA		Zm00008a026799_P01	Nu_25156-RA
AT5G18840.1	Nu_24034-RA					GSVIVT01017935001	Nu_06328-RA		Zm00008a027728_P01	Nu_25156-RA
AT5G61520.1	Nu_06328-RA					GSVIVT01017836001	Nu_06328-RA		Zm00008a027728_P01	Nu_12183-RA
AT5G18840.1	Nu_06328-RA					GSVIVT01017836001	Nu_01003-RA		Zm00008a027959_P01	Nu_21420-RA
AT5G18840.1	Nu_01003-RA					GSVIVT01017844001	Nu_15309-RA		Zm00008a029199_P01	Nu_12183-RA
Nu_09362-RA	Nu_09960-RA					GSVIVT01024909001	Nu_18727-RA		Zm00008a029086_P01	Nu_12183-RA
Nu_16191-RA	Nu_01185-RA					GSVIVT01024909001	Nu_24034-RA		Zm00008a027959_P01	Nu_12183-RA
Nu_06218-RA	Nu_06739-RA					GSVIVT01011047001	Nu_06218-RA		Zm00008a029199_P01	Nu_21420-RA
Nu_17184-RA	Nu_06739-RA					GSVIVT01011047001	Nu_06739-RA		Zm00008a029199_P01	Nu_17644-RA
Nu_09960-RA	Nu_12183-RA					GSVIVT01022309001	Nu_09472-RA		Zm00008a027728_P01	Nu_17644-RA
Nu_16569-RA	Nu_12183-RA					GSVIVT01022309001	Nu_26101-RA		Zm00008a026799_P01	Nu_07730-RA
Nu_17184-RA	Nu_07730-RA					GSVIVT01022309001	Nu_18727-RA		Zm00008a029086_P01	Nu_17644-RA
Nu_09960-RA	Nu_17644-RA					GSVIVT01022309001	Nu_12183-RA		Zm00008a027959_P01	Nu_17644-RA
Nu_17184-RA	Nu_00446-RA					GSVIVT01011047001	Nu_17644-RA		Zm00008a028036_P01	Nu_07730-RA
Nu_09360-RA	Nu_04671-RA					GSVIVT01022309001	Nu_24034-RA		Zm00008a029086_P01	Nu_07730-RA
Nu_16569-RA	Nu_05413-RA					GSVIVT01022309001	Nu_05360-RA		Zm00008a029086_P01	Nu_00446-RA
Nu_17184-RA	Nu_05360-RA					GSVIVT01022309001	Nu_06328-RA		Zm00008a026799_P01	Nu_00446-RA
Nu_16482-RA	Nu_05413-RA					GSVIVT01011047001	Nu_15309-RA		Zm00008a027959_P01	Nu_00446-RA
Nu_22489-RA	Nu_05413-RA					GSVIVT01022309001	Nu_15309-RA		Zm00008a029199_P01	Nu_05413-RA
Nu_01559-RA	Nu_24034-RA					GSVIVT01017076001	Nu_26138-RA		Zm00008a026799_P01	Nu_05413-RA
Nu_01185-RA	Nu_24034-RA					GSVIVT01017076001	Nu_21420-RA		Zm00008a029199_P01	Nu_05360-RA
Nu_16569-RA	Nu_06328-RA					GSVIVT01003181001	Nu_09360-RA		Zm00008a028036_P01	Nu_24034-RA
Nu_21187-RA	Nu_04671-RA					GSVIVT01003181001	Nu_09960-RA		Zm00008a027959_P01	Nu_05413-RA
Nu_06862-RA	Nu_17644-RA					Nu_09362-RA	Nu_09960-RA		Zm00008a027959_P01	Nu_05360-RA
Nu_06739-RA	Nu_00446-RA					Nu_16191-RA	Nu_01185-RA		Zm00008a026799_P01	Nu_24034-RA
Nu_06862-RA	Nu_01003-RA					Nu_06218-RA	Nu_06739-RA		Zm00008a029199_P01	Nu_06328-RA
Nu_09472-RA	Nu_24034-RA					Nu_17184-RA	Nu_06739-RA		Zm00008a026799_P01	Nu_06328-RA
Nu_25156-RA	Nu_26101-RA					Nu_09960-RA	Nu_12183-RA		Zm00008a030851_P01	Nu_01559-RA
Nu_25156-RA	Nu_12183-RA					Nu_16569-RA	Nu_12183-RA		Zm00008a030851_P01	Nu_01185-RA
Nu_26138-RA	Nu_21420-RA					Nu_17184-RA	Nu_07730-RA		Zm00008a030851_P01	Nu_21187-RA
Nu_26101-RA	Nu_17644-RA					Nu_09960-RA	Nu_17644-RA		Zm00008a030804_P01	Nu_12183-RA
Nu_25156-RA	Nu_06328-RA					Nu_17184-RA	Nu_00446-RA		Zm00008a030851_P01	Nu_18727-RA
Nu_12183-RA	Nu_17644-RA					Nu_09360-RA	Nu_04671-RA		Zm00008a030055_P01	Nu_07730-RA
Nu_12183-RA	Nu_07730-RA					Nu_16569-RA	Nu_05413-RA		Zm00008a030851_P01	Nu_07730-RA
Nu_12183-RA	Nu_00446-RA					Nu_17184-RA	Nu_05360-RA		Zm00008a030055_P01	Nu_00446-RA
Nu_18727-RA	Nu_05360-RA					Nu_16482-RA	Nu_05413-RA		Zm00008a029919_P01	Nu_00446-RA
Nu_18727-RA	Nu_15308-RA					Nu_22489-RA	Nu_05413-RA		Zm00008a030851_P01	Nu_05360-RA
Nu_07730-RA	Nu_00446-RA					Nu_01559-RA	Nu_24034-RA		Zm00008a029919_P01	Nu_24034-RA
Nu_00446-RA	Nu_06328-RA					Nu_01185-RA	Nu_24034-RA		Zm00008a032195_P01	Nu_24034-RA
Nu_24034-RA	Nu_15308-RA					Nu_16569-RA	Nu_06328-RA		Zm00008a030804_P01	Nu_06328-RA
						Nu_21187-RA	Nu_04671-RA		Zm00008a030804_P01	Nu_15309-RA
						Nu_06862-RA	Nu_17644-RA		Zm00008a033768_P01	Nu_06739-RA
						Nu_06739-RA	Nu_00446-RA		Zm00008a033768_P01	Nu_07730-RA
						Nu_06862-RA	Nu_01003-RA		Zm00008a035920_P01	Nu_05413-RA
						Nu_09472-RA	Nu_24034-RA		Zm00008a033768_P01	Nu_06328-RA
						Nu_25156-RA	Nu_26101-RA		Zm00008a038155_P01	Nu_06218-RA
						Nu_25156-RA	Nu_12183-RA		Zm00008a038661_P01	Nu_01185-RA
						Nu_26138-RA	Nu_21420-RA		Zm00008a036826_P01	Nu_06862-RA
						Nu_26101-RA	Nu_17644-RA		Zm00008a038229_P01	Nu_21420-RA
						Nu_25156-RA	Nu_06328-RA		Zm00008a038229_P01	Nu_17644-RA
						Nu_12183-RA	Nu_17644-RA		Zm00008a036826_P01	Nu_01003-RA
									Nu_09362-RA	Nu_09960-RA
									Nu_16191-RA	Nu_01185-RA
									Nu_06218-RA	Nu_06739-RA
									Nu_17184-RA	Nu_06739-RA
									Nu_09960-RA	Nu_12183-RA
									Nu_16569-RA	Nu_12183-RA
									Nu_17184-RA	Nu_07730-RA
									Nu_09960-RA	Nu_17644-RA
									Nu_17184-RA	Nu_00446-RA
									Nu_09360-RA	Nu_04671-RA
									Nu_16569-RA	Nu_05413-RA
									Nu_17184-RA	Nu_05360-RA
									Nu_16482-RA	Nu_05413-RA
									Nu_22489-RA	Nu_05413-RA
									Nu_01559-RA	Nu_24034-RA
									Nu_01185-RA	Nu_24034-RA
									Nu_16569-RA	Nu_06328-RA
									Nu_21187-RA	Nu_04671-RA
									Nu_06862-RA	Nu_17644-RA
									Nu_06739-RA	Nu_00446-RA
									Nu_06862-RA	Nu_01003-RA
									Nu_09472-RA	Nu_24034-RA
									Nu_25156-RA	Nu_26101-RA
									Nu_25156-RA	Nu_12183-RA
									Nu_26138-RA	Nu_21420-RA
									Nu_26101-RA	Nu_17644-RA
									Nu_25156-RA	Nu_06328-RA
									Nu_12183-RA	Nu_17644-RA
									Nu_12183-RA	Nu_07730-RA
									Nu_12183-RA	Nu_00446-RA
									Nu_18727-RA	Nu_05360-RA
									Nu_18727-RA	Nu_15308-RA
									Nu_07730-RA	Nu_00446-RA
									Nu_00446-RA	Nu_06328-RA
									Nu_24034-RA	Nu_15308-RA

## Sheet: TableS3
Supplementary Table 3: Ka/Ks calculation of the NuMST gene pairs in Nelumbo ucifera and Arabidopsis
Gene ID1	Gene ID2	Ka	Ks	KA/Ks
Nu_00446-RA	Nu_06328-RA	0.891081	NaN	NaN
Nu_01185-RA	Nu_24034-RA	0.734667	2.10553	0.348923
Nu_01559-RA	Nu_24034-RA	0.724817	2.23063	0.324938
Nu_06218-RA	Nu_06739-RA	0.0623968	0.583073	0.107014
Nu_06739-RA	Nu_00446-RA	0.806845	3.08964	0.261145
Nu_06862-RA	Nu_01003-RA	0.15284	0.353476	0.432392
Nu_07730-RA	Nu_00446-RA	0.0754947	0.342914	0.220157
Nu_09472-RA	Nu_24034-RA	0.0792723	0.482169	0.164408
Nu_09960-RA	Nu_17644-RA	0.232383	1.72615	0.134625
Nu_09960-RA	Nu_17644-RA	0.232383	1.72615	0.134625
Nu_12183-RA	Nu_07730-RA	0.864622	2.76915	0.312234
Nu_12183-RA	Nu_00446-RA	0.869401	2.31538	0.375489
Nu_16191-RA	Nu_01185-RA	0.104067	0.380483	0.273512
Nu_18727-RA	Nu_05360-RA	0.739586	2.19758	0.336545
Nu_22489-RA	Nu_05413-RA	0.782127	2.36496	0.330714
Nu_25156-RA	Nu_12183-RA	0.0870735	0.55409	0.157147
Nu_25156-RA	Nu_06328-RA	0.350525	2.49571	0.140451
Nu_26138-RA	Nu_21420-RA	0.228953	0.466926	0.490341
AT1G20840.1	Nu_09472-RA	0.251324	2.55281	0.0984499
AT1G67300.1	Nu_21420-RA	0.269921	1.33837	0.201678
AT1G19450.1	Nu_12183-RA	0.929779	3.44634	0.269787
AT1G20840.1	Nu_24034-RA	0.253273	2.11125	0.119963
AT1G19450.1	Nu_05360-RA	0.200811	1.29974	0.154502
AT1G75220.1	Nu_05360-RA	0.175893	1.19099	0.147687
AT2G20780.1	Nu_01185-RA	0.201607	2.40462	0.0838415
AT2G20780.1	Nu_09360-RA	0.863219	3.49464	0.247012
AT2G20780.1	Nu_16191-RA	0.216078	3.89603	0.0554611
AT2G43330.1	Nu_00446-RA	0.737639	1.64722	0.447808
AT2G16120.1	Nu_05413-RA	0.287995	3.32425	0.0866346
AT3G05150.1	Nu_06862-RA	0.330205	2.1047	0.156889
AT3G18830.1	Nu_06739-RA	0.824398	3.27753	0.25153
AT4G04750.1	Nu_01185-RA	0.830321	2.36793	0.350653
AT4G16480.1	Nu_15996-RA	0.269271	3.01117	0.089424
AT4G35300.1	Nu_09472-RA	0.179236	1.80881	0.0990901
AT4G35300.1	Nu_24034-RA	0.159167	1.66967	0.0953283
AT4G04750.1	Nu_24034-RA	0.768383	3.05112	0.251836
AT5G18840.1	Nu_06862-RA	0.237844	2.13632	0.111334
AT5G59250.1	Nu_18727-RA	0.199654	1.55301	0.128559
AT5G16150.1	Nu_07730-RA	0.165034	1.7654	0.0934822
AT5G16150.1	Nu_00446-RA	0.158212	1.43301	0.110405
AT5G18840.1	Nu_00446-RA	0.889666	2.65503	0.335088
AT5G18840.1	Nu_24034-RA	0.824474	2.44067	0.337806
AT5G18840.1	Nu_06328-RA	0.971457	2.20821	0.43993

## Sheet: TableS4
Supplementary Table 5: Relative expression of NuMSTgenes in different tissues
Gene_ID	leaf	petiole	Flower	Rhizome
NuINT1	1.55536	0.0761719	1.50683	0.19904
NuINT2	1.37713	0.0431026	0.0655099	0.0051299
NuINT3	2.20534	0.359024	0.712682	0.053241
NuINT4	0.444838	0.677347	3.52552	0.295033
NupGlcT1	0.263846	0.121667	3.5579	0.100657
NupGlcT2	1.28271	0.716942	17.1972	0.957166
NupGlcT3	2.62884	0.294267	4.20163	0.227807
NupGlcT4	2.13632	5.16126	13.6225	8.6307
NupGlcT5	0.394483	1.09193	4.35731	2.6581
NuPLT1	10.8701	0.39621	0.00231778	0.10414
NuPLT2	2.01635	0.0969899	0.00686433	0.00371425
NuPLT3	0.383576	1.48888	1.02009	0.193291
NuPLT4	2.1932	1.18052	10.6569	0.0899204
NuSFP1	0.501832	0.510951	1.32307	0.50213
NuSFP2	0.505729	1.96405	0.264137	0.211357
NuSFP3	3.08935	2.45172	1.04703	22.511
NuSFP4	1.1128	0.693133	5.8999	1.38393
NuSFP5	2.18769	0.94918	5.66136	2.1784
NuSTP1	1.04847	0.187416	0.013371	0.0198212
NuSTP2	0.0585261	0.400714	14.9609	0.583784
NuSTP3	2.55258	1.04434	4.94749	1.75861
NuSTP4	17.0586	0.287427	0.0030313	0.0220991
NuSTP5	10.1415	0.0400313	0.00625032	0.267234
NuSTP6	0.0446311	0.0220581	0.0412143	0.00834466
NuSTP7	2.21284	0.423769	1.1536	0.177958
NuSTP8	5.11484	0.957049	0.431692	0.0714404
NuSTP9	5.62075	1.57186	30.4517	1.75432
NutMT1	2.77162	0.814206	2.67362	0.950212
NutMT2	5.31361	3.32703	6.03806	6.68454
NuVGT1	2.51331	0.399637	3.06205	0.577627
NuVGT2	8.30906	1.02459	3.05467	1.30323

## Sheet: TableS5
Supplementary Table 6: Relative expression of NuMST genes in different treatments by qRT-PCR
	Cold			Nacl			PEG						CK
gene	Cold-8h	Cold-16h	Cold-24h	Nacl-8h	Nacl-16h	Nacl-24h	PEG-8h	PEG-16h	PEG-24h	ABA-8h	ABA-16h	ABA-24h	CK-0h	CK-8h	CK-16h	CK-24h
NuINT1	0.642658	0.0817682	3.29618	2.14047	2.52788	1.24109	5.14625	2.17293	2.30488	1.92663	0.646712	1.11301	1	1	1	1
NuINT2	1.31656	0.32143	3.87755	1.50181	1.4937	1.02515	9.15915	0.788048	1.45355	4.11606	1.22414	3.34596	1	1	1	1
NuINT3	14.7034	1.12011	1.51276	2.2314	0.426537	3.93595	1.37561	0.424618	0.49045	11.8936	2.8907	7.58589	1	1	1	1
NuINT4	0.787492	5.03524	0.523943	1.05981	2.54506	1.68025	1.75879	2.30007	0.418932	6.35061	0.683853	0.821931	1	1	1	1
NupGlcT1	1.68843	0.389098	0.267045	0.955884	0.481705	1.01001	0.828935	0.934711	0.775096	3.35858	0.402637	1.38314	1	1	1	1
NupGlcT2	1.56041	0.740542	0.630492	0.719089	0.442704	1.34443	1.92344	0.727327	0.381106	5.53524	1.16289	0.858357	1	1	1	1
NupGlcT3	2.79919	0.709221	3.41741	2.48241	0.910016	3.50365	2.94889	1.27922	1.98061	8.83942	1.38845	0.993157	1	1	1	1
NupGlcT4	3.04638	1.72559	1.09798	2.1852	2.32701	2.27767	6.40271	3.15132	4.47234	0.40552	0.391779	0.33646	1	1	1	1
NupGlcT5	2.94634	2.66863	3.52832	4.72442	10.4761	2.28865	0.290448	0.299235	0.194034	1.30542	1.79232	0.414077	1	1	1	1
NuPLT1	0.876739	0.356133	0.606185	2.77965	5.69709	0.471712	2.28357	3.5455	0.488498	1.14125	5.36734	1.06676	1	1	1	1
NuPLT2	0.168244	0.0613671	0.779332	21.8167	15.2485	4.87284	1.21134	0.447613	1.63444	2.39913	0.718381	1.79113	1	1	1	1
NuPLT3	0.453247	0.197293	0.423452	1.15055	1.20579	1.15877	2.22795	0.81281	1.1542	2.34635	0.969827	1.30325	1	1	1	1
NuPLT4	1.98589	0.631305	2.49646	0.872708	1.15915	0.782391	2.22437	0.674308	1.92608	3.11327	1.09482	1.06867	1	1	1	1
NuSFP1	0.666688	0.186137	0.339446	1.16673	4.58351	0.809422	1.37119	1.71409	2.63515	1.74819	1.52349	1.42649	1	1	1	1
NuSFP2	0.224969	1.34682	0.369163	0.596617	6.62791	0.275396	0.0744245	0.756688	3.14687	0.226084	2.60568	1.06603	1	1	1	1
NuSFP3	0.819217	0.140558	0.0778629	1.74098	3.69804	0.349957	0.586014	0.462451	0.230272	2.20086	1.76666	0.298785	1	1	1	1
NuSFP4	0.588804	0.295081	0.414473	2.16334	5.4081	2.5732	4.08001	1.0953	4.96802	5.44028	2.69356	1.13347	1	1	1	1
NuSFP5	1.4341	0.378493	0.757935	1.95187	1.96371	1.64355	0.671643	1.47082	1.13905	25.2962	1.99943	1.37528	1	1	1	1
NuSTP1	5.56843	0.444024	3.50325	6.58559	2.46293	1.61139	6.91303	1.19535	1.70599	14.269	1.03812	1.35291	1	1	1	1
NuSTP2	8.64242	1.64021	1.83723	8.47601	14.8081	3.18038	11.8046	4.60764	2.23636	30.0935	7.61635	4.96829	1	1	1	1
NuSTP3	1.33484	1.04981	7.23768	1.26503	3.48222	0.029602	5.87171	1.01515	0.0184677	2.03622	1.01295	0.0310755	1	1	1	1
NuSTP4	2.12804	0.132438	1.04404	8.53837	1.67504	0.103392	6.44066	0.556694	0.600793	26.9402	1.10098	2.56539	1	1	1	1
NuSTP5	16.0275	0.57767	8.80964	15.605	3.13973	11.549	24.3741	1.42319	49.0477	30.5769	0.141474	1.53704	1	1	1	1
NuSTP6	0.975081	0.397178	0.138146	7.22488	2.9175	0.481308	1.21772	0.752708	0.196848	6.35454	0.484162	0.633646	1	1	1	1
NuSTP7	0.871775	0.375603	0.100869	1.19062	2.64546	0.369619	11.7635	2.52457	1.35457	3.34349	1.88829	0.583045	1	1	1	1
NuSTP8	2.06185	1.54626	9.53229	19.2723	13.1849	15.3212	2.0328	6.40646	24.8663	11.2863	0.983307	8.30834	1	1	1	1
NuSTP9	0.848237	0.637943	0.491667	2.57162	1.87599	3.82758	3.49116	1.38885	1.71034	2.56084	2.18084	2.12432	1	1	1	1
NutMT1	0.705014	0.180088	1.06375	6.9336	5.09826	1.18804	2.37557	2.01673	1.51705	3.76799	3.22355	1.39055	1	1	1	1
NutMT2	1.15085	0.33296	0.935801	3.86432	11.7584	3.03602	3.34538	5.89161	5.37231	1.12677	1.55246	0.554396	1	1	1	1
NuVGT1	1.97575	0.836272	1.31376	8.06488	5.36935	1.29328	4.96685	2.71055	1.21258	9.94844	4.03928	1.31321	1	1	1	1
NuVGT2	0.781549	0.72779	0.467257	0.893489	2.3791	0.396539	0.907112	1.35454	0.479955	2.22732	1.44931	0.562021	1	1	1	1

## Sheet: TableS6
Sequence of primers related to sugar transporters
	Primer name	Primer sequences（5′-3′）
Internal reference primer sequences	TUA-F	ACCGCCTCGTCTCTCTTTGG
	TUA-R	CGACCTGAATCCCCGCTTGT
Nu_20869-RA	NuINT1-F	TTTGGGCGGCGGCGTTTAG
	NuINT1-R	CCACGCAGAACACCTTCCTCAC
Nu_05143-RA	NuINT2-F	AGGAGGCGGAGATGCGACTC
	NuINT2-R	CGACGAACTGTGGGTGATGGC
Nu_15996-RA	NuINT3-F	AGTCTGGCCCTTGCACTCTCTC
	NuINT3-R	AGCAGCCTCCTCCTCCCAAATC
Nu_15362-RA	NuINT4-F	TGGAGGGTGGCATTCACAAAGC
	NuINT4-R	GCTGAGAGGGCAAGACGCAAG
Nu_20358-RA	NupGlcT1-F	CAGTCTGCACCCTTCACAGG
	NupGlcT1-R	ACCCAGAACCTATGCTTCCGA
Nu_26138-RA	NupGlcT2-F	GCGCAGGGCCTTCCAGTTG
	NupGlcT2-R	GACCCAGACCCATCCCAGTTCC
Nu_21420-RA	NupGlcT3-F	CGGGGTCGTCAAACTTCATGGG
	NupGlcT3-R	GCCTCCAGGAAGGGTTTGTAGC
Nu_07730-RA	NupGlcT4-F	CAGAGGCTGGGTGGTTTGACC
	NupGlcT4-R	GCTGCGGAACACAGAAGTGGAG
Nu_00446-RA	NupGlcT5-F	CCGTGGGAGCAGAACTTAGTCG
	NupGlcT5-R	AGGGGCTTGGTGGGGACAAC
Nu_05413-RA	NuPLT1-F	CAGCGGAGTGCAACGACGAG
	NuPLT1-R	CGGTGACGGGCGGAGGAG
Nu_05414-RA	NuPLT2-F	AGGAGGCGGAGATGCGACTC
	NuPLT2-R	CGACGAACTGTGGGTGATGGC
Nu_01185-RA	NuPLT3-F	GCTGGGGTGGGAATAGGCTTTG
	NuPLT3-R	GATCCTCTGGCAATGGCTGGTG
Nu_16191-RA	NuPLT4-F	TACGACAGGCAGCAGGGATGG
	NuPLT4-R	TTTGCCGAAGTGAAGGGGAAGG
Nu_15309-RA	NuSFP1-F	TGTAGTGGAGGTGGTGGTGGTG
	NuSFP1-R	ACCCGAGGCAGCGATGAAGG
Nu_06862-RA	NuSFP2-F	TGGGTCCTGTGTGGGCTATTCG
	NuSFP2-R	TTGTAACTGCCCCAGCCATTGC
Nu_01003-RA	NuSFP3-F	AGGAGCACTGGAATGGGAGCAG
	NuSFP3-R	TCACCAGAGTCACCAGGCTTCC
Nu_05358-RA	NuSFP4-F	CGCAAGCCGTTCCTCCACAC
	NuSFP4-R	AGGACCCAAGGCGACGATGAG
Nu_05360-RA	NuSFP5-F	GGTTGGACTAGTGGCGTTGGTG
	NuSFP5-R	GCCCAGGATGTGAGCCAGTTG
Nu_09360-RA	NuSTP1-F	TGGCTGGGGTTGGCGTCTC
	NuSTP1-R	TGCGTTGGATAAGGCTGTTGGG
Nu_09960-RA	NuSTP2-F	CTCTACCTTGCCGCTCTTGTGG
	NuSTP2-R	TAACCGCTGCCGCATTGATGG
Nu_17644-RA	NuSTP3-F	GCCTCAGCTCGTCATGTCCATC
	NuSTP3-R	CACCGCCAAAGCCCAGTGTC
Nu_06218-RA	NuSTP4-F	TGCGTCCACCGTCGTCTCTATC
	NuSTP4-R	AGTGGTCCGTCACCTTGATCCC
Nu_06739-RA	NuSTP5-F	GCGGTGCTGTTAGGGATCAAGG
	NuSTP5-R	ACGACCAGGCGAACGATGAAAC
Nu_06212-RA	NuSTP6-F	CCTCCGCTGGTCATTGGCATTC
	NuSTP6-R	GTTCTTGAAGCCGACGGACTGG
Nu_12183-RA	NuSTP7-F	TTGACAGCAGCGCAGAACTCTC
	NuSTP7-R	TCCTCCCCATGACCACCCAAAG
Nu_21187-RA	NuSTP8-F	GCTGGGCAGAGTGTGGTTGTC
	NuSTP8-R	CCATAACGGAGGTGGCAGAGTG
Nu_26101-RA	NuSTP9-F	GTCCTCTCGGGTGGCTAGTTCC
	NuSTP9-R	ATCGGAGGTGGCAGAGAGCTAC
Nu_24034-RA	NutMT1-F	CCTGTCACTGGGCAAAGCACTC
	NutMT1-R	AGGGTCCATAAGGGGCACACTC
Nu_09472-RA	NutMT2-F	CACTGCTCTCACGTCAGCCAAC
	NutMT2-R	CTGCCAACCACCACCAATACCC
Nu_01559-RA	NuVGT1-F	GTTGATGCTGTCCGCTCTCCTC
	NuVGT1-R	TGCATCGCCAGCCCAATTCC
Nu_18727-RA	NuVGT2-F	ATTGATGCGGTTGGAGGATGGC
	NuVGT2-R	AGCGTGGAGATGGTGGGAGAC

## Sheet: TableS7
Synteny analysis of lotus root and rice
Nelumbo ucifera	Oryza sativa L.
NNU_14686-RA	LOC_Os01g66890.1.MSUv7.0
NNU_09852-RA	LOC_Os01g18170.1.MSUv7.0
NNU_23509-RA	LOC_Os01g15540.1.MSUv7.0
NNU_23508-RA	LOC_Os01g15600.1.MSUv7.0
NNU_23511-RA	LOC_Os01g15530.1.MSUv7.0
NNU_11480-RA	LOC_Os02g55320.1.MSUv7.0
NNU_10620-RA	LOC_Os03g43930.1.MSUv7.0
NNU_10621-RA	LOC_Os03g43910.1.MSUv7.0
NNU_19075-RA	LOC_Os01g15039.1.MSUv7.0
NNU_05158-RA	LOC_Os03g25990.1.MSUv7.0
NNU_12656-RA	LOC_Os04g48410.1.MSUv7.0
NNU_12657-RA	LOC_Os04g48416.1.MSUv7.0
NNU_14934-RA	LOC_Os01g19170.1.MSUv7.0
NNU_09843-RA	LOC_Os07g03780.1.MSUv7.0
NNU_01331-RA	LOC_Os07g03780.1.MSUv7.0
NNU_22604-RA	LOC_Os05g38290.2.MSUv7.0
NNU_05618-RA	LOC_Os05g45860.1.MSUv7.0
NNU_07763-RA	LOC_Os06g48300.1.MSUv7.0
NNU_06806-RA	LOC_Os05g33080.1.MSUv7.0
NNU_06813-RA	LOC_Os05g33030.1.MSUv7.0
NNU_06818-RA	LOC_Os05g33230.1.MSUv7.0
NNU_06819-RA	LOC_Os05g33270.1.MSUv7.0
NNU_06823-RA	LOC_Os05g33280.1.MSUv7.0
NNU_06820-RA	LOC_Os05g33300.1.MSUv7.0
NNU_06842-RA	LOC_Os05g33500.1.MSUv7.0
NNU_06845-RA	LOC_Os05g33514.2.MSUv7.0
NNU_06843-RA	LOC_Os05g33570.1.MSUv7.0
NNU_06851-RA	LOC_Os05g34270.1.MSUv7.0
NNU_06849-RA	LOC_Os05g33610.1.MSUv7.0
NNU_06857-RA	LOC_Os05g33630.2.MSUv7.0
NNU_06853-RA	LOC_Os05g33690.3.MSUv7.0
NNU_06859-RA	LOC_Os05g33710.1.MSUv7.0
NNU_06858-RA	LOC_Os05g33730.1.MSUv7.0
NNU_06861-RA	LOC_Os05g33810.1.MSUv7.0
NNU_18461-RA	LOC_Os09g37012.1.MSUv7.0
NNU_12661-RA	LOC_Os02g47220.2.MSUv7.0
NNU_09076-RA	LOC_Os03g60910.1.MSUv7.0
NNU_05638-RA	LOC_Os02g44610.1.MSUv7.0
NNU_03114-RA	LOC_Os02g56630.1.MSUv7.0
NNU_03109-RA	LOC_Os02g44610.1.MSUv7.0
NNU_16610-RA	LOC_Os11g33100.1.MSUv7.0
NNU_16609-RA	LOC_Os11g33110.1.MSUv7.0
NNU_24244-RA	LOC_Os10g42750.1.MSUv7.0
NNU_14179-RA	LOC_Os01g72990.2.MSUv7.0
NNU_22862-RA	LOC_Os05g31530.1.MSUv7.0
NNU_08253-RA	LOC_Os01g18584.1.MSUv7.0
NNU_08259-RA	LOC_Os01g18450.1.MSUv7.0
NNU_08269-RA	LOC_Os01g18240.1.MSUv7.0
NNU_08279-RA	LOC_Os01g18210.1.MSUv7.0
NNU_15374-RA	LOC_Os01g67500.1.MSUv7.0
NNU_00101-RA	LOC_Os01g66180.1.MSUv7.0
NNU_22349-RA	LOC_Os11g32960.1.MSUv7.0
NNU_21968-RA	LOC_Os02g38140.1.MSUv7.0
NNU_21959-RA	LOC_Os02g38090.1.MSUv7.0
NNU_17223-RA	LOC_Os09g32690.1.MSUv7.0
NNU_09443-RA	LOC_Os03g61220.1.MSUv7.0
NNU_09442-RA	LOC_Os03g61220.1.MSUv7.0
NNU_09440-RA	LOC_Os03g61210.1.MSUv7.0
NNU_09437-RA	LOC_Os03g61210.1.MSUv7.0
NNU_09434-RA	LOC_Os03g61200.1.MSUv7.0
NNU_09275-RA	LOC_Os05g40770.1.MSUv7.0
NNU_03415-RA	LOC_Os12g42040.1.MSUv7.0
NNU_08163-RA	LOC_Os01g16240.1.MSUv7.0
NNU_01702-RA	LOC_Os04g55940.1.MSUv7.0
NNU_01709-RA	LOC_Os04g55920.1.MSUv7.0
NNU_04306-RA	LOC_Os05g42210.1.MSUv7.0
NNU_15537-RA	LOC_Os01g58730.1.MSUv7.0
NNU_15534-RA	LOC_Os01g58700.1.MSUv7.0
NNU_15531-RA	LOC_Os01g58680.1.MSUv7.0
NNU_11499-RA	LOC_Os02g28900.1.MSUv7.0
NNU_11501-RA	LOC_Os01g07560.1.MSUv7.0
NNU_11502-RA	LOC_Os03g51240.2.MSUv7.0
NNU_05620-RA	LOC_Os03g01830.1.MSUv7.0
NNU_05623-RA	LOC_Os03g01840.1.MSUv7.0
NNU_10136-RA	LOC_Os04g54200.1.MSUv7.0
NNU_10138-RA	LOC_Os04g55510.1.MSUv7.0
NNU_10140-RA	LOC_Os04g52760.1.MSUv7.0
NNU_05141-RA	LOC_Os07g05370.1.MSUv7.0
NNU_05142-RA	LOC_Os07g05630.1.MSUv7.0
NNU_05143-RA	LOC_Os07g05640.1.MSUv7.0
NNU_05145-RA	LOC_Os07g05720.1.MSUv7.0
NNU_08553-RA	LOC_Os01g47540.1.MSUv7.0
NNU_01145-RA	LOC_Os03g20650.1.MSUv7.0
NNU_19071-RA	LOC_Os05g02020.1.MSUv7.0
NNU_22598-RA	LOC_Os04g51450.1.MSUv7.0
NNU_22602-RA	LOC_Os02g40710.1.MSUv7.0
NNU_01124-RA	LOC_Os01g23970.1.MSUv7.0
NNU_18024-RA	LOC_Os04g32310.1.MSUv7.0
NNU_01815-RA	LOC_Os05g45954.1.MSUv7.0
NNU_01814-RA	LOC_Os02g07360.1.MSUv7.0
NNU_10555-RA	LOC_Os01g43910.1.MSUv7.0
NNU_00891-RA	LOC_Os06g46250.1.MSUv7.0
NNU_00894-RA	LOC_Os06g46240.1.MSUv7.0
NNU_22762-RA	LOC_Os07g05050.1.MSUv7.0
NNU_15707-RA	LOC_Os01g60080.1.MSUv7.0
